# Supplementary material for: Effect of Selenium Nanoparticles and Mannan Oligosaccharide Supplementation on Growth Performance, Stress Indicators, and Intestinal Microarchitecture of Broilers Reared under High Stocking Density
Source: MDPI journal article supplement (doi:10.3390/ani12212910), 2022-10-24
Supplement: s1 [file s1]

# Supplementary Material

**Supplementary Table S1.** Effect of Selenium nanoparticles-MOS supplementation on relative weight-length of visceral organs in broilers chickens reared under high stocking density

| Parameters                                                                  | Control (NSD) | Control (HSD) | Se-0.15 +HSD | MOS+H SD | Se-0.15-MOS+H SD | SeNP+H SD | SeNP-M OS+HSD | Pooled SEM | P-value |
|-----------------------------------------------------------------------------|---------------|---------------|--------------|----------|------------------|-----------|---------------|------------|---------|
| <b>Relative weight and length of visceral organs on 21<sup>st</sup> day</b> |               |               |              |          |                  |           |               |            |         |
| Liver (%)                                                                   | 3.10          | 3.13          | 2.91         | 3.05     | 3.00             | 3.12      | 2.89          | 0.038      | 0.593   |
| Pancreas (%)                                                                | 0.30          | 0.34          | 0.32         | 0.32     | 0.32             | 0.33      | 0.33          | 0.005      | 0.715   |
| Proventriculus-filled (%)                                                   | 0.54          | 0.67          | 0.58         | 0.65     | 0.61             | 0.62      | 0.70          | 0.026      | 0.130   |
| Proventriculus-empty (%)                                                    | 0.47          | 0.55          | 0.52         | 0.53     | 0.54             | 0.54      | 0.57          | 0.009      | 0.262   |
| Gizzard-filled (%)                                                          | 3.16          | 3.66          | 3.62         | 3.69     | 3.49             | 3.68      | 3.54          | 0.060      | 0.419   |
| Gizzard-empty (%)                                                           | 2.13          | 2.64          | 2.46         | 2.53     | 2.30             | 2.56      | 2.12          | 0.053      | 0.101   |
| Spleen (%)                                                                  | 0.092         | 0.094         | 0.071        | 0.095    | 0.093            | 0.072     | 0.083         | 0.004      | 0.674   |
| Heart (%)                                                                   | 0.54          | 0.70          | 0.60         | 0.67     | 0.69             | 0.65      | 0.64          | 0.014      | 0.110   |
| Bursa of Fabricius (%)                                                      | 0.12          | 0.14          | 0.13         | 0.15     | 0.13             | 0.14      | 0.12          | 0.005      | 0.932   |
| S.I relative length (%)                                                     | 15.87         | 17.11         | 16.90        | 17.71    | 16.96            | 17.38     | 16.97         | 0.165      | 0.210   |
| S.I weight-filled (%)                                                       | 4.93          | 4.82          | 4.98         | 5.03     | 4.96             | 4.99      | 5.06          | 0.063      | 0.992   |
| S.I weight-empty (%)                                                        | 3.37          | 2.94          | 2.98         | 2.91     | 3.01             | 3.07      | 3.08          | 0.060      | 0.697   |
| L.I relative length (%)                                                     | 2.19          | 2.23          | 2.06         | 2.12     | 2.16             | 2.16      | 2.21          | 0.032      | 0.933   |
| L.I weight-filled (%)                                                       | 0.76          | 0.74          | 0.70         | 0.75     | 0.72             | 0.71      | 0.72          | 0.012      | 0.900   |
| L.I weight-empty (%)                                                        | 0.51          | 0.50          | 0.49         | 0.50     | 0.51             | 0.51      | 0.50          | 0.008      | 0.948   |
| <b>Relative weight and length of visceral organs on 42<sup>nd</sup> day</b> |               |               |              |          |                  |           |               |            |         |
| Liver (%)                                                                   | 1.75          | 1.77          | 1.89         | 1.76     | 1.75             | 2.05      | 1.84          | 0.029      | 0.164   |
| Pancreas (%)                                                                | 0.18          | 0.19          | 0.20         | 0.18     | 0.19             | 0.20      | 0.19          | 0.003      | 0.908   |
| Proventriculus-filled (%)                                                   | 0.29          | 0.36          | 0.33         | 0.30     | 0.34             | 0.37      | 0.33          | 0.008      | 0.275   |
| Proventriculus-empty (%)                                                    | 0.27          | 0.34          | 0.29         | 0.28     | 0.30             | 0.35      | 0.31          | 0.008      | 0.182   |
| Gizzard-filled (%)                                                          | 1.97          | 2.48          | 2.48         | 2.02     | 2.28             | 2.51      | 2.18          | 0.056      | 0.092   |
| Gizzard-empty (%)                                                           | 1.22          | 1.30          | 1.28         | 1.31     | 1.35             | 1.34      | 1.30          | 0.021      | 0.885   |
| Spleen (%)                                                                  | 0.08          | 0.06          | 0.08         | 0.07     | 0.08             | 0.09      | 0.09          | 0.002      | 0.245   |
| Heart (%)                                                                   | 0.34          | 0.42          | 0.42         | 0.39     | 0.37             | 0.41      | 0.38          | 0.012      | 0.698   |
| Bursa of Fabricius (%)                                                      | 0.033         | 0.023         | 0.024        | 0.028    | 0.033            | 0.035     | 0.037         | 0.001      | 0.064   |
| S.I relative length (%)                                                     | 6.55          | 6.94          | 7.14         | 7.33     | 7.08             | 7.16      | 7.06          | 0.105      | 0.780   |
| S.I weight-filled (%)                                                       | 3.29          | 3.65          | 3.41         | 3.57     | 3.58             | 3.43      | 3.72          | 0.071      | 0.815   |
| S.I weight-empty (%)                                                        | 2.08          | 1.74          | 1.91         | 2.14     | 1.94             | 1.96      | 2.07          | 0.045      | 0.201   |
| L.I relative length (%)                                                     | 0.91          | 1.00          | 0.88         | 0.94     | 0.90             | 0.99      | 0.82          | 0.021      | 0.503   |
| L.I weight-filled (%)                                                       | 0.71          | 0.74          | 0.65         | 0.84     | 0.74             | 0.75      | 0.83          | 0.026      | 0.611   |
| L.I weight-empty (%)                                                        | 0.51          | 0.44          | 0.43         | 0.57     | 0.49             | 0.49      | 0.56          | 0.021      | 0.684   |

a-d within the same row, means with different superscripts are significantly different (p<0.05).

Values represent means of eight replicates (16 birds per group).

NSD: Normal stocking density, HSD: High stocking density, Se: Selenium selenite, SeNP: Selenium nanoparticles, MOS: Mannan oligosaccharide, S.I: Small intestine, L.I: Large intestine
